# Supplementary figures and images for: Changes in Microbial Communities Using Pigs as a Model for Postmortem Interval Estimation
Source: MDPI journal article supplement (doi:10.3390/microorganisms11112811), 2023-11-20

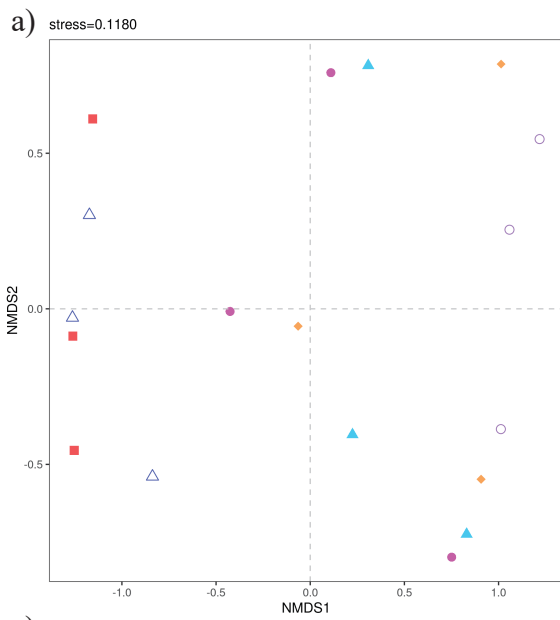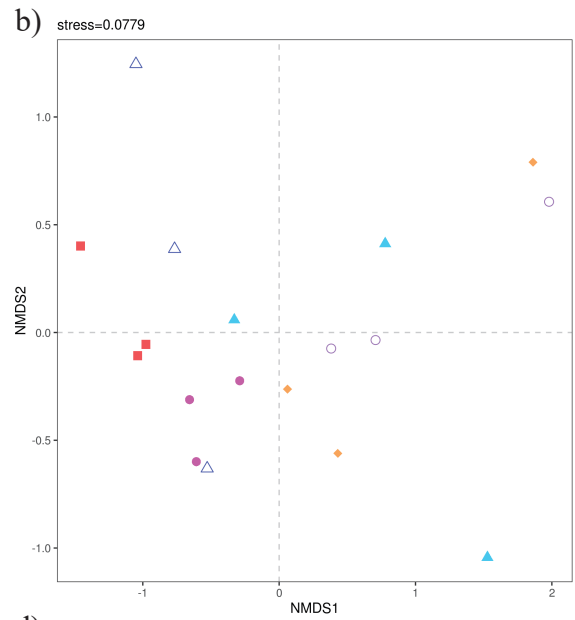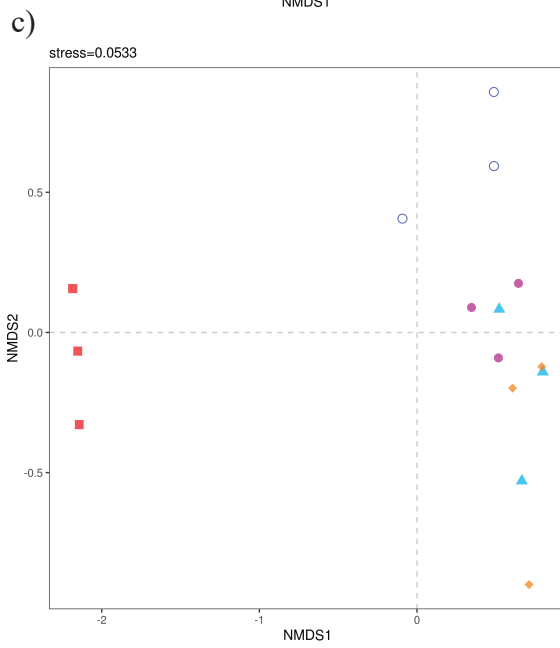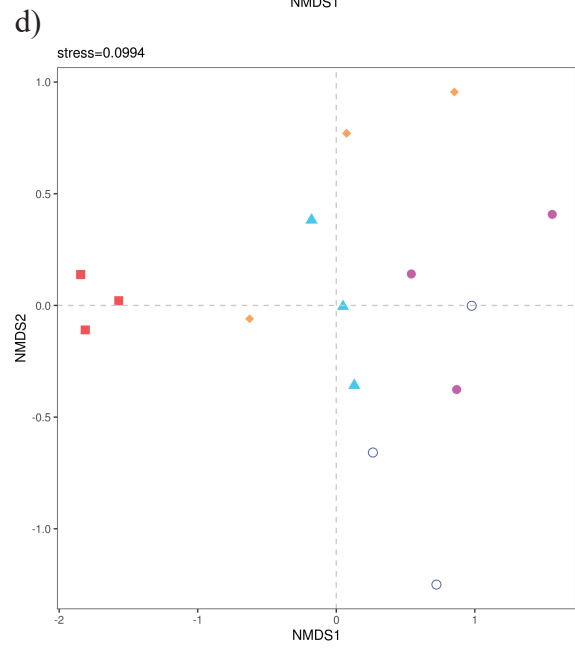

Supplement: s1 [file s1]
